# Supplementary material
Source: PubMed Central journal article supplement (PMC4150322)
Supplement: rspb20141093supp1.pdf [file rspb20141093supp1.pdf]

**Table S1** - Data information of samples used for environmental correlates analyses and number of individuals sequenced used for selection tests.

Note: all references can be found in the paper.

| Sea Basin     | Country       | Location            | Figure 1a code | Reference                     | Year | Month     | Longitude | Latitude | N   | A   | B  | Nseq | temperature | nitrate | salinity | silicate | phosphate | AOU   |
|---------------|---------------|---------------------|----------------|-------------------------------|------|-----------|-----------|----------|-----|-----|----|------|-------------|---------|----------|----------|-----------|-------|
| Baltic        | Poland        | Gdansk              | 1              | Silva et al., 2014            | 2008 | February  | 16.5      | 54.55    | 9   | 2   | 7  | 9    | 8.38        | 1.23    | 7.23     | 11.22    | 0.33      | -0.11 |
| Baltic        | Germany       | Kiel                | 2              | Zarraonindia et al., 2012     | 2006 | November  | 10.17     | 54.92    | 28  | 3   | 25 |      | 9.86        | 5.33    | 29.78    | 4.83     | 0.45      | -0.14 |
| Atlantic      | Denmark       | Denmark             | 3              | Zarraonindia et al., 2012     | 2007 | July      | 11.57     | 57.14    | 15  | 1   | 14 |      | 9.86        | 5.33    | 29.78    | 4.83     | 0.45      | -0.14 |
| Atlantic      | Norway        | Oslo                | 4              | Silva et al., 2014            | 2007 | October   | 10.63     | 58.98    | 24  | 2   | 22 | 24   | 9.57        | 4.32    | 35.06    | 2.54     | 0.42      | 0.01  |
| Atlantic      | Scotland      | Scotland            | 5              | Zarraonindia et al., 2012     | 2009 | February  | 2.33      | 56.14    | 11  | 1   | 10 |      | 9.80        | 2.97    | 34.75    | 2.15     | 0.37      | -0.01 |
| Atlantic      | Scotland      | Scotland            | 5              | Zarraonindia et al., 2012     | 2009 | May       | -1.15     | 58.09    | 24  | 5   | 19 |      | 9.57        | 4.32    | 35.06    | 2.54     | 0.42      | 0.01  |
| Atlantic      | Germany       | Germany             | 6              | Zarraonindia et al., 2012     | 2007 | April     | 6.49      | 54.43    | 11  | 1   | 10 |      | 10.29       | 8.13    | 33.32    | 5.19     | 0.56      | -0.12 |
| Atlantic      | France        | English Channel     | 7              | Silva et al., 2014            | 2007 | October   | 0.12      | 50.75    | 27  | 3   | 24 | 27   | 11.91       | 8.27    | 34.75    | 4.12     | 0.53      | -0.35 |
| Atlantic      | France        | English Channel     | 7              | Zarraonindia et al., 2012     | 2007 | October   | -4.28     | 50.2     | 25  | 5   | 20 |      | 12.42       | 4.44    | 35.21    | 2.23     | 0.29      | -0.12 |
| Atlantic      | France        | St Jean de Luz      | 8              | Magoulas et al., 2006         | 2001 | April     | -1.68     | 43.4     | 50  | 21  | 29 |      | 16.02       | 0.87    | 35.33    | 0.92     | 0.06      | -0.13 |
| Atlantic      | France        | St Jean de Luz      | 8              | Magoulas et al., 1996         | 1993 | March     | -1.68     | 43.4     | 47  | 19  | 28 |      | 16.02       | 0.87    | 35.33    | 0.92     | 0.06      | -0.13 |
| Atlantic      | France        | Nantes              | 8              | Borrel et al., 2012           | 2009 | May       | -2.5      | 47       | 29  | 15  | 14 |      | 14.36       | 3.19    | 35.16    | 2.18     | 0.17      | -0.06 |
| Atlantic      | Spain         | Bay of Biscay-5029  | 8              | Zarraonindia et al., 2012     | 2008 | May       | -1.87     | 45.87    | 29  | 13  | 16 |      | 15.07       | 2.10    | 35.10    | 1.78     | 0.13      | -0.08 |
| Atlantic      | Spain         | Bay of Biscay-5020  | 8              | Zarraonindia et al., 2012     | 2009 | May       | -1.92     | 44.6     | 27  | 11  | 16 |      | 16.04       | 0.94    | 35.25    | 0.96     | 0.07      | -0.12 |
| Atlantic      | Spain         | Bay of Biscay-5001  | 8              | Zarraonindia et al., 2012     | 2009 | May       | -2.21     | 43.35    | 45  | 31  | 14 |      | 15.99       | 0.85    | 35.36    | 0.92     | 0.06      | -0.13 |
| Atlantic      | Spain         | Bay of Biscay*      | 8              | Silva et al., 2014            | 2007 | -         | -2.85     | 43.54    | 23  | 9   | 14 | 23   | 15.94       | 0.83    | 35.40    | 0.92     | 0.06      | -0.14 |
| Atlantic      | Spain         | East Cantabrian Sea | 8              | Borrel et al., 2012           | 2009 | April     | -2.6      | 44       | 15  | 9   | 6  |      | 15.96       | 0.83    | 35.39    | 0.92     | 0.06      | -0.14 |
| Atlantic      | Spain         | West Cantabrian Sea | 8              | Borrel et al., 2012           | 2009 | April     | -4.01     | 43.47    | 39  | 29  | 10 |      | 15.64       | 0.96    | 35.62    | 0.97     | 0.07      | -0.13 |
| Atlantic      | Spain         | Getaria Coast       | 8              | Borrel et al., 2012           | 2009 | May       | -2.54     | 44.2     | 12  | 3   | 9  |      | 15.97       | 0.81    | 35.38    | 0.91     | 0.06      | -0.14 |
| Atlantic      | Spain         | Valdearenas         | 8              | Borrel et al., 2012           | 2009 | April     | -3.97     | 43.44    | 20  | 10  | 10 |      | 15.75       | 0.88    | 35.55    | 0.96     | 0.06      | -0.14 |
| Atlantic      | Spain         | Galicia             | 9              | Zarraonindia et al., 2012     | 2010 | March     | -8.94     | 42.53    | 29  | 26  | 3  |      | 15.37       | 1.30    | 35.68    | 0.79     | 0.11      | -0.10 |
| Atlantic      | Portugal      | Aveiro              | 10             | Zarraonindia et al., 2012     | 2008 | -         | -8.66     | 40.71    | 23  | 18  | 5  |      | 16.30       | 0.95    | 35.77    | 0.84     | 0.09      | -0.16 |
| Atlantic      | Portugal      | Aveiro              | 10             | Magoulas et al., 2006         | 1998 | March     | -8.66     | 40.71    | 70  | 63  | 7  | 25   | 16.30       | 0.95    | 35.77    | 0.84     | 0.09      | -0.16 |
| Atlantic      | Portugal      | Olhão               | 11             | Magoulas et al., 2006         | 1997 | July      | -7.85     | 36.94    | 57  | 51  | 6  |      | 18.27       | 1.52    | 36.26    | 1.19     | 0.12      | -0.13 |
| Atlantic      | Portugal      | Portugal South      | 11             | Zarraonindia et al., 2012     | 2008 | February  | -9.35     | 38.6     | 28  | 22  | 6  |      | 17.29       | 0.73    | 36.04    | 1.03     | 0.14      | -0.14 |
| Atlantic      | Portugal      | Armação de Pêra     | 11             | Silva et al., 2014            | 2007 | July      | -8.4      | 37.1     | 29  | 24  | 5  | 29   | 18.07       | 1.31    | 36.26    | 1.16     | 0.12      | -0.15 |
| Atlantic      | Spain         | Cadiz               | 11             | Zarraonindia et al., 2012     | 2009 | April     | -6.47     | 36.54    | 60  | 55  | 5  |      | 18.42       | 2.28    | 36.14    | 1.47     | 0.13      | -0.08 |
| Atlantic      | Morocco       | Tangier             | 11             | Magoulas et al., 2006         | 1997 | December  | -5.85     | 35.88    | 62  | 60  | 2  | 38   | 18.60       | 2.39    | 36.34    | 1.54     | 0.14      | -0.09 |
| Atlantic      | Spain         | Canary islands      | 12             | Zarraonindia et al., 2012     | 2007 | May       | -15.65    | 27.72    | 28  | 26  | 2  |      | 20.91       | 0.25    | 36.76    | 1.64     | 0.11      | -0.10 |
| Atlantic      | Spain         | Canary islands      | 12             | Magoulas et al., 2006         | 1999 | March     | -15.04    | 28.27    | 48  | 44  | 4  | 24   | 20.68       | 0.30    | 36.65    | 1.95     | 0.13      | -0.11 |
| Atlantic      | Senegal       | Dakar               | 13             | Magoulas et al., 2006         | 1999 | March     | -17.61    | 14.82    | 34  | 32  | 2  | 25   | 24.54       | 1.70    | 35.69    | 1.83     | 0.28      | -0.06 |
| Atlantic      | Guinea-Bissau | Guinea-Bissau       | 14             | Silva et al., submitted       | 2006 | April     | -14.23    | 9.72     | 20  | 20  | 0  | 20   | 26.82       | 1.23    | 34.33    | 1.91     | 0.27      | 0.01  |
| Atlantic      | Ghana         | Accra               | 15             | Silva et al., submitted       | 2008 | April     | 0.02      | 5.59     | 25  | 25  | 0  | 25   | 27.15       | 0.98    | 34.91    | 5.49     | 0.20      | -0.26 |
| Atlantic      | Angola        | Angola              | 16             | This work                     | 2007 | August    | 13.78     | -10.9    | 24  | 20  | 4  | 24   | 24.85       | 1.39    | 35.36    | 4.03     | 0.25      | -0.08 |
| Atlantic      | Namibia       | Namibia             | 17             | This work                     | 2007 | August    | 11.7      | -17.17   | 24  | 5   | 19 | 24   | 18.52       | 10.44   | 35.64    | 4.38     | 0.86      | 0.24  |
| Atlantic      | South Africa  | South Africa        | 18             | Zarraonindia et al., 2012     | 2009 | September | 18        | -34      | 30  | 4   | 26 |      | 17.50       | 2.24    | 35.38    | 5.18     | 0.61      | -0.23 |
| Atlantic      | South Africa  | Hout Bay            | 18             | Grant et al., 2005            | 1987 | August    | 18.35     | -34.06   | 18  | 16  | 2  |      | 17.68       | 2.14    | 35.38    | 5.08     | 0.60      | -0.23 |
| Atlantic      | South Africa  | South Africa        | 18             | This work                     | 2007 | August    | 20.97     | -34.7    | 11  | 4   | 7  | 11   | 19.18       | 1.58    | 35.38    | 4.22     | 0.45      | -0.14 |
| Mediterranean | Spain         | Alboran Sea         | 19             | Zarraonindia et al., 2012     | 2009 | October   | -4.04     | 36.53    | 68  | 63  | 5  |      | 18.17       | 2.50    | 36.46    | 2.93     | 0.17      | -0.08 |
| Mediterranean | Spain         | Malaga              | 19             | Magoulas et al., 2006         | 1998 | November  | -4.35     | 36.6     | 47  | 43  | 4  | 25   | 18.21       | 2.52    | 36.46    | 2.75     | 0.17      | -0.08 |
| Mediterranean | Spain         | Balearics           | 20             | Zarraonindia et al., 2012     | 2007 | -         | 0.89      | 40.55    | 26  | 9   | 17 |      | 18.34       | 0.68    | 37.63    | 1.19     | 0.13      | -0.08 |
| Mediterranean | Spain         | Tarragona           | 20             | Zarraonindia et al., 2012     | 2009 | March     | 1.17      | 40.88    | 33  | 11  | 22 |      | 18.23       | 0.69    | 37.63    | 1.09     | 0.14      | -0.07 |
| Mediterranean | Spain         | Barcelona           | 20             | Grant et al., 2005            | 1988 | September | 1.86      | 41.12    | 16  | 7   | 9  |      | 18.02       | 0.74    | 37.71    | 1.15     | 0.15      | -0.04 |
| Mediterranean | France        | Gulf of Lion        | 21             | This work                     | 2008 | June      | 3.98      | 43.2     | 22  | 5   | 17 | 22   | 16.70       | 1.22    | 37.95    | 1.18     | 0.17      | 0.13  |
| Mediterranean | France        | Sete                | 21             | Magoulas et al., 1996         | 1992 | December  | 3.98      | 43.2     | 50  | 21  | 29 |      | 16.70       | 1.22    | 37.95    | 1.18     | 0.17      | 0.13  |
| Mediterranean | Italy         | Livorno             | 22             | Magoulas et al., 2006         | 1998 | May       | 10.09     | 43.52    | 55  | 27  | 28 |      | 17.63       | 1.23    | 38.04    | 2.11     | 0.16      | -0.05 |
| Mediterranean | Tunisia       | Tunis               | 23             | This work                     | 2009 | February  | 10.65     | 37.28    | 28  | 16  | 12 | 28   | 18.60       | 1.25    | 37.37    | 3.50     | 0.11      | -0.06 |
| Mediterranean | Italy         | Chioggia            | 24             | Magoulas et al., 1996         | 1993 | November  | 12.49     | 45.31    | 57  | 7   | 50 |      | 17.19       | 0.57    | 37.33    | 2.16     | 0.07      | -0.07 |
| Mediterranean | Italy         | Chioggia            | 24             | Magoulas et al., 2006         | 1997 | July      | 12.49     | 45.31    | 57  | 5   | 52 | 28   | 17.19       | 0.57    | 37.33    | 2.16     | 0.07      | -0.07 |
| Mediterranean | Croatia       | Split               | 25             | Borrel et al., 2012           | 2009 | June      | 16.13     | 43.03    | 20  | 5   | 15 |      | 17.88       | 0.69    | 38.10    | 3.94     | 0.05      | 0.00  |
| Mediterranean | Italy         | Adriatic Sea        | 25             | Zarraonindia et al., 2012     | 2007 | October   | 15.47     | 42.83    | 27  | 3   | 24 |      | 17.80       | 0.71    | 38.07    | 3.80     | 0.06      | 0.01  |
| Mediterranean | Italy         | Bari                | 25             | Magoulas et al., 2006         | 1997 | July      | 17        | 41.3     | 70  | 8   | 62 |      | 18.07       | 0.42    | 38.41    | 3.92     | 0.08      | -0.07 |
| Mediterranean | Italy         | Otranto             | 25             | Magoulas et al., 2006         | 1998 | August    | 18.55     | 40.14    | 71  | 15  | 56 |      | 18.95       | 0.35    | 38.29    | 6.07     | 0.04      | -0.11 |
| Mediterranean | Greece        | Aegean Sea          | 26             | Zarraonindia et al., 2012     | 2008 | July      | 24.68     | 40.25    | 32  | 31  | 1  |      | 17.86       | 0.43    | 37.88    | 5.04     | 0.11      | -0.11 |
| Mediterranean | Greece        | Gulf of Kavala      | 26             | Magoulas et al., 1996         | 1989 | May       | 24.29     | 40.65    | 141 | 121 | 20 |      | 17.89       | 0.43    | 37.83    | 4.99     | 0.11      | -0.11 |
| Mediterranean | Greece        | Gulf of Kavala      | 26             | Magoulas et al., 1996         | 1989 | October   | 24.3      | 40.6     | 57  | 46  | 11 |      | 17.89       | 0.43    | 37.83    | 4.99     | 0.11      | -0.11 |
| Mediterranean | Greece        | Pagassitikos Gulf   | 26             | Magoulas et al., 1996         | 1992 | September | 23.6      | 38.91    | 20  | 17  | 3  |      | 18.10       | 0.40    | 37.83    | 4.48     | 0.10      | -0.10 |
| Mediterranean | Greece        | Oreoi Strait        | 26             | Kristoffersen & Magoulas 2008 | 2000 | December  | 23.03     | 38.96    | 126 | 105 | 21 |      | 18.08       | 0.42    | 37.74    | 4.57     | 0.10      | -0.10 |
| Mediterranean | Greece        | Oreoi Strait        | 26             | Kristoffersen & Magoulas 2008 | 2000 | December  | 23.03     | 38.96    | 56  | 44  | 12 |      | 18.08       | 0.42    | 37.74    | 4.57     | 0.10      | -0.10 |
| Mediterranean | Greece        | Oreoi Strait        | 26             | Kristoffersen & Magoulas 2008 | 2000 | December  | 23.03     | 38.96    | 115 | 85  | 30 |      | 18.08       | 0.42    | 37.74    | 4.57     | 0.10      | -0.10 |
| Mediterranean | Greece        | Saronikos Gulf      | 26             | Magoulas et al., 1996         | 1993 | June      | 23.07     | 37.17    | 59  | 20  | 39 |      | 19.15       | 0.43    | 38.85    | 1.63     | 0.12      | -0.11 |
| Mediterranean | Greece        | Patraikos Gulf      | 26             | Magoulas et al., 1996         | 1989 | August    | 21.67     | 38.26    | 118 | 36  | 82 |      | 19.69       | 0.43    | 38.54    | 2.97     | 0.11      | -0.10 |
| Mediterranean | Greece        | Patras              | 26             | Kristoffersen & Magoulas 2008 | 2001 | January   | 21.67     | 38.26    | 103 | 42  | 61 |      | 19.69       | 0.43    | 38.54    | 2.97     | 0.11      | -0.10 |
| Mediterranean | Greece        | Patraikos Gulf      | 26             | Magoulas et al., 1996         | 1989 | October   | 21.67     | 38.26    | 54  | 21  | 33 |      | 19.69       | 0.43    | 38.54    | 2.97     | 0.11      | -0.10 |
| Mediterranean | Greece        | Patras              | 26             | Kristoffersen & Magoulas 2008 | 2001 | February  | 21.67     | 38.26    | 86  | 30  | 56 |      | 19.69       | 0.43    | 38.54    | 2.97     | 0.11      | -0.10 |
| Mediterranean | Israel        | Telaviv             | 27             | This work                     | 2008 | July      | 34.59     | 32.08    | 26  | 26  | 0  | 26   | 21.94       | 0.32    | 39.09    | 1.68     | 0.11      | -0.01 |

N: total number of individuals; A: number of clade A individuals; B: number of clade B individuals; Nseq: number of sequences used in tests of recombination and selection.

**Table S2** - Significant physico-chemical properties of Cytb codon 368 amino acid changes ( $p < 0.001$ ): TreeSAAP analyses of magnitude categories ranging from 6 to 8.

| Property                                                                                                             | Property reference | Category | Z-score value |
|----------------------------------------------------------------------------------------------------------------------|--------------------|----------|---------------|
| Normalized frequency of C-terminal beta-sheet                                                                        | CHOP780209         | 6        | 3.257         |
| Normalized frequency of alpha-helix, with weights                                                                    | LEVM780101         | 6        | 4.761         |
| Distribution of amino acid residues in the 18 non-redundant families of thermophilic proteins                        | KUMS000101         | 6        | 4.787         |
| Normalized positional residue frequency at helix termini C4                                                          | AURR980112         | 6        | 5.14          |
| Amino acid composition                                                                                               | DAYM780101         | 6        | 5.31          |
| Alpha-helix indices for alpha/beta-proteins                                                                          | GEIM800104         | 6        | 6.918         |
| Amino acid distribution                                                                                              | JUKT750101         | 7        | 3.402         |
| AA composition of EXT of single-spanning proteins                                                                    | NAKH920103         | 7        | 4.368         |
| Normalized frequency of beta-sheet in alpha/beta class                                                               | PALJ810112         | 7        | 4.897         |
| Normalized frequency of alpha-helix in alpha/beta class                                                              | PALJ810109         | 7        | 5.045         |
| Heat capacity                                                                                                        | HUTJ700101         | 7        | 5.75          |
| Normalized composition from animal                                                                                   | NAKH900106         | 8        | 3.51          |
| Normalized composition of mt-proteins                                                                                | NAKH900104         | 8        | 3.51          |
| Relative preference value at C5                                                                                      | RICJ880110         | 8        | 4.25          |
| A parameter defined from the residuals obtained from the best correlation of the Chou-Fasman parameter of beta-sheet | CHAM830102         | 8        | 5.045         |
